# Supplementary material for: Novel NLO-phores containing dihexyl amino benzo[b]thiophene exhibiting good transparency and enhanced electro-optical activity
Source: Royal Society of Chemistry journal article supplement (doi:10.1039/c4ra00883a), 2014-01-01

## ***Supporting Information***

Novel NLO-phores containing dihexyl amino benzo[b]thiophene  
exhibiting good transparency and enhanced electro-optical activity

Maolin Zhang,<sup>ab</sup> Huajun Xu,<sup>ab</sup> Chengcheng Peng,<sup>ab</sup> Heyan Huang,<sup>ab</sup> Shuhui Bo,<sup>\*a</sup> Jialei Liu,<sup>a</sup> Xinhou Liu,<sup>a</sup> Zhen Zhen<sup>a</sup> and Ling Qiu<sup>\*a</sup>

<sup>a</sup> Key Laboratory of Photochemical Conversion and Optoelectronic Materials, Technique Institute of Physics and Chemistry, Chinese Academy of Sciences, Beijing, 100049, China. E-mail: [qiuling@mail.ipc.ac.cn](mailto:qiuling@mail.ipc.ac.cn); [boshuhui@mail.ipc.ac.cn](mailto:boshuhui@mail.ipc.ac.cn); Fax: +86 10 62554670. Tel: +86 10-8254 3529

<sup>b</sup> Graduated University of Chinese Academy of Sciences, Beijing, 100049, China.

## **Contents**

1. Figures S1-S12. NMR spectra of resulted compounds.

1. Figures S1-S12. NMR spectra of resulted compounds.

Figure S1.  $^1\text{H}$  NMR spectrum of compound 2

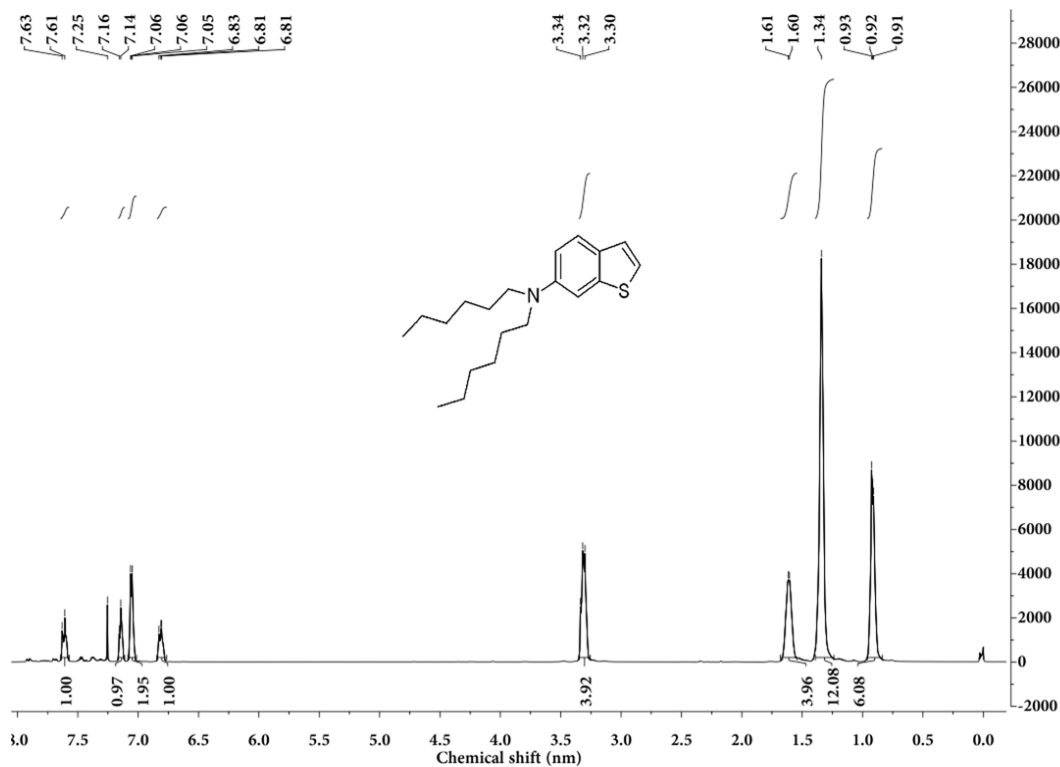

Figure S2.  $^{13}\text{C}$  NMR spectrum of compound 2

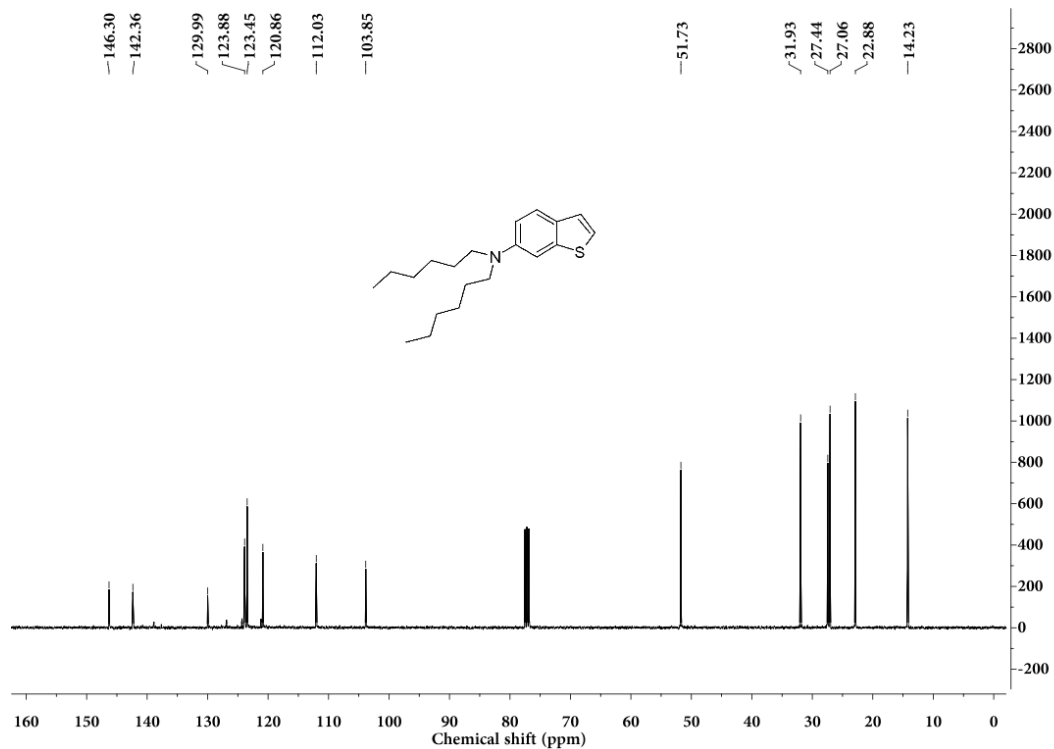

Figure S3.  $^1\text{H}$  NMR spectrum of compound 3

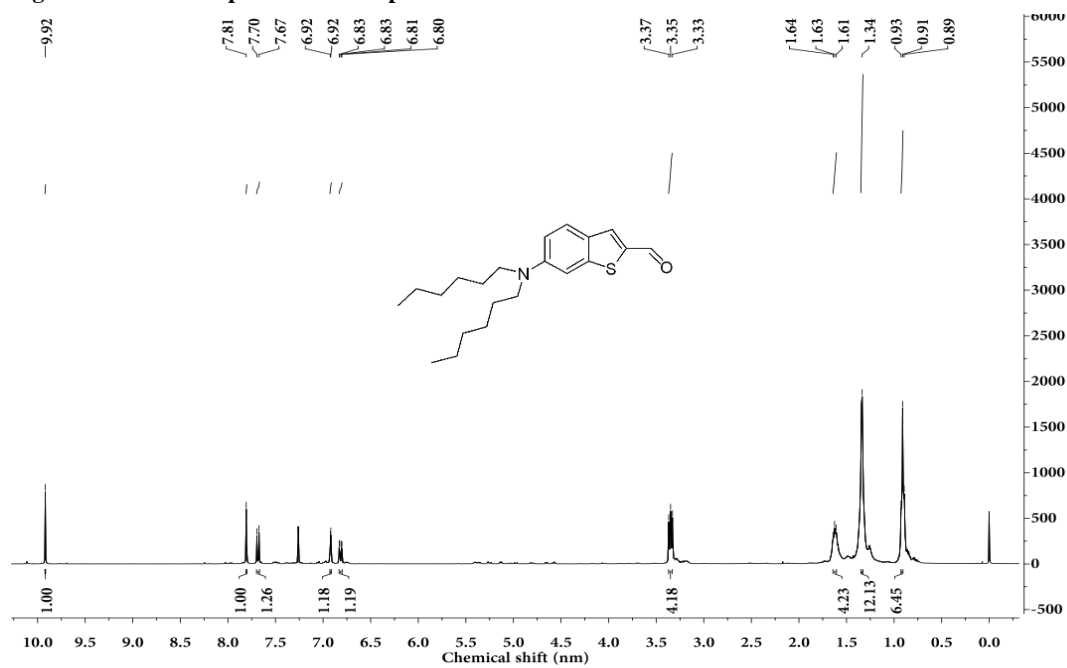

Figure S4.  $^{13}\text{C}$  NMR spectrum of compound 3

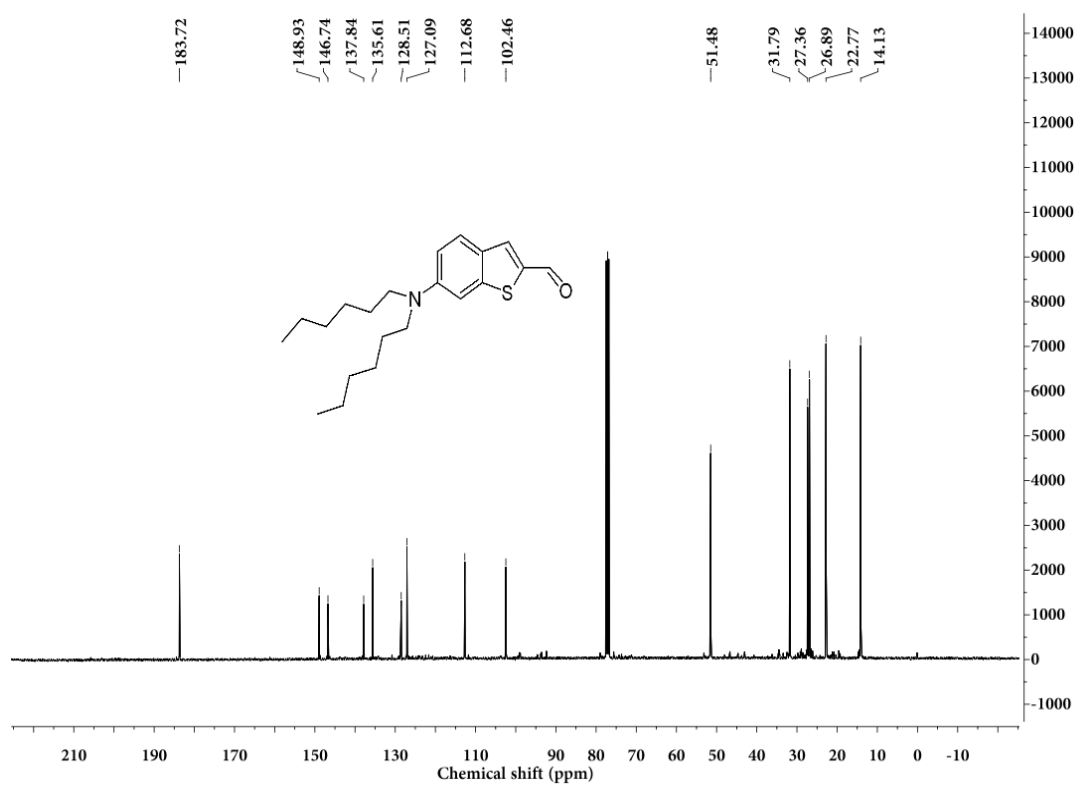

Figure S5.  $^1\text{H}$  NMR spectrum of compound A

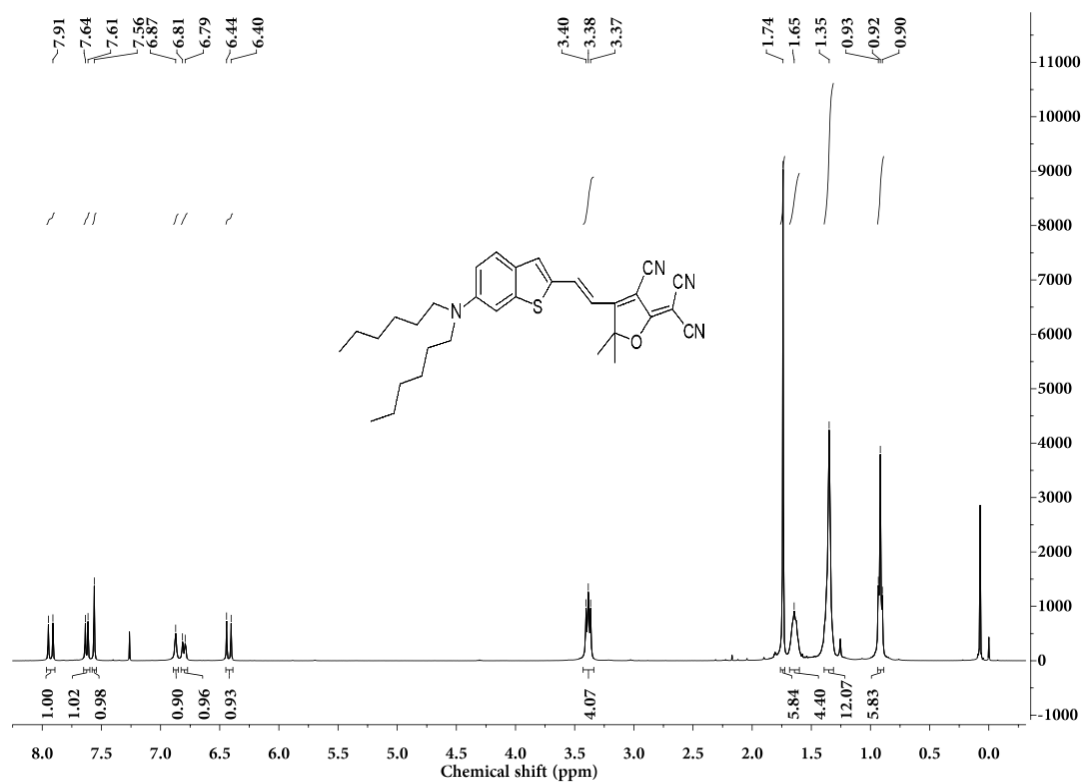

Figure S6.  $^{13}\text{C}$  NMR spectrum of compound A

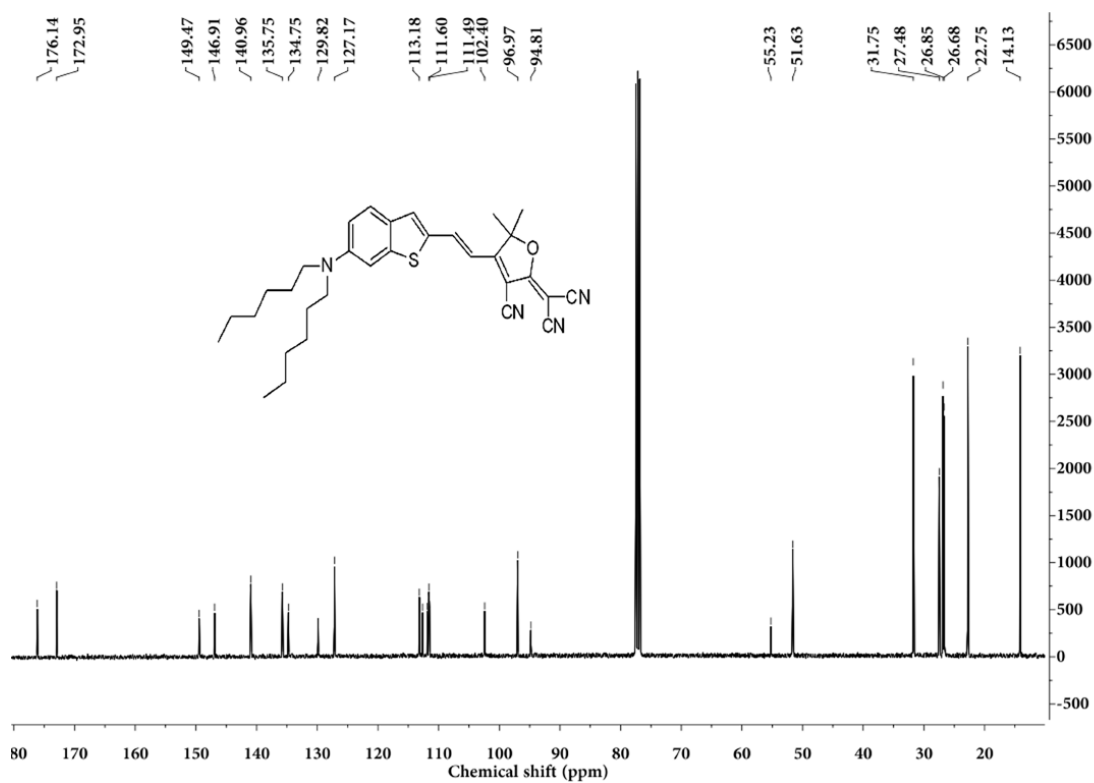

Figure S7.  $^1\text{H}$  NMR spectrum of compound 4

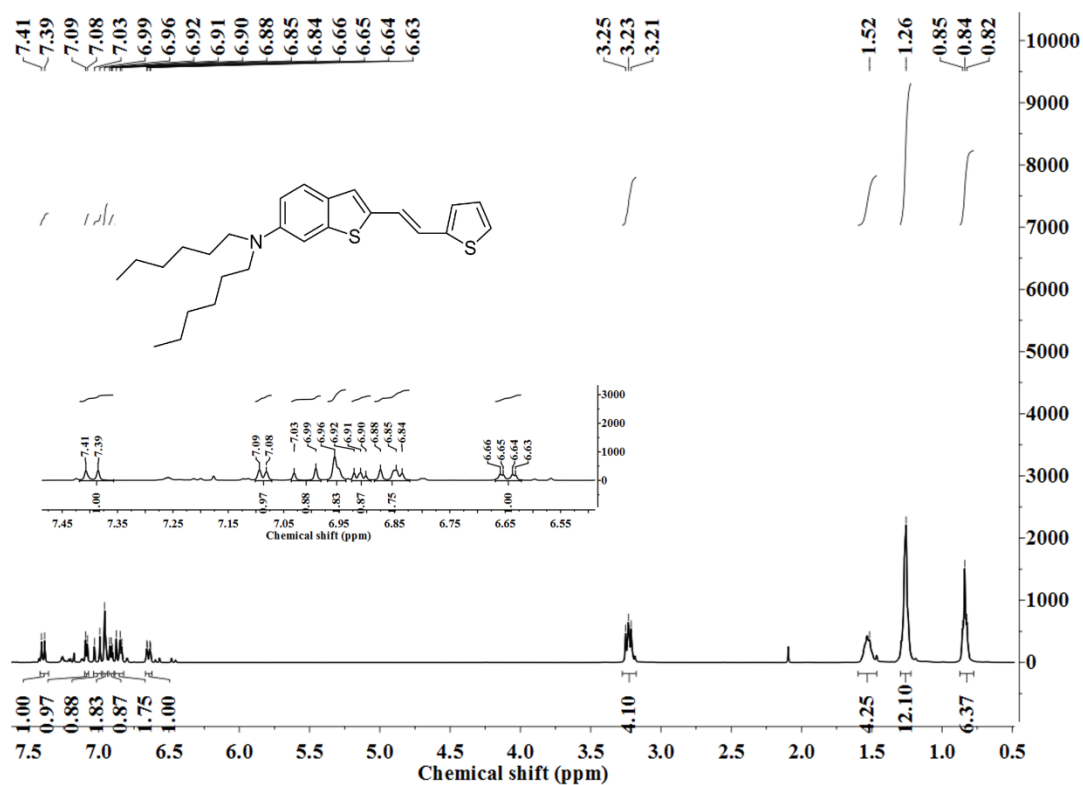

Figure S8.  $^{13}\text{C}$  NMR spectrum of compound 4

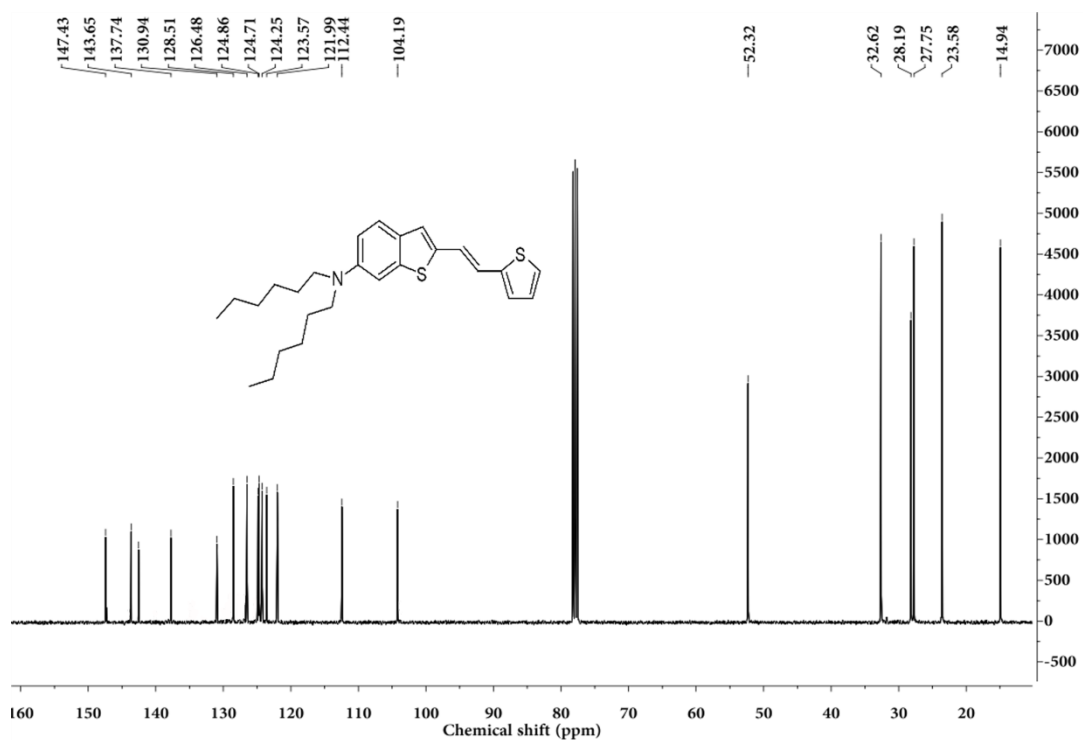

Figure S9.  $^1\text{H}$  NMR spectrum of compound 5

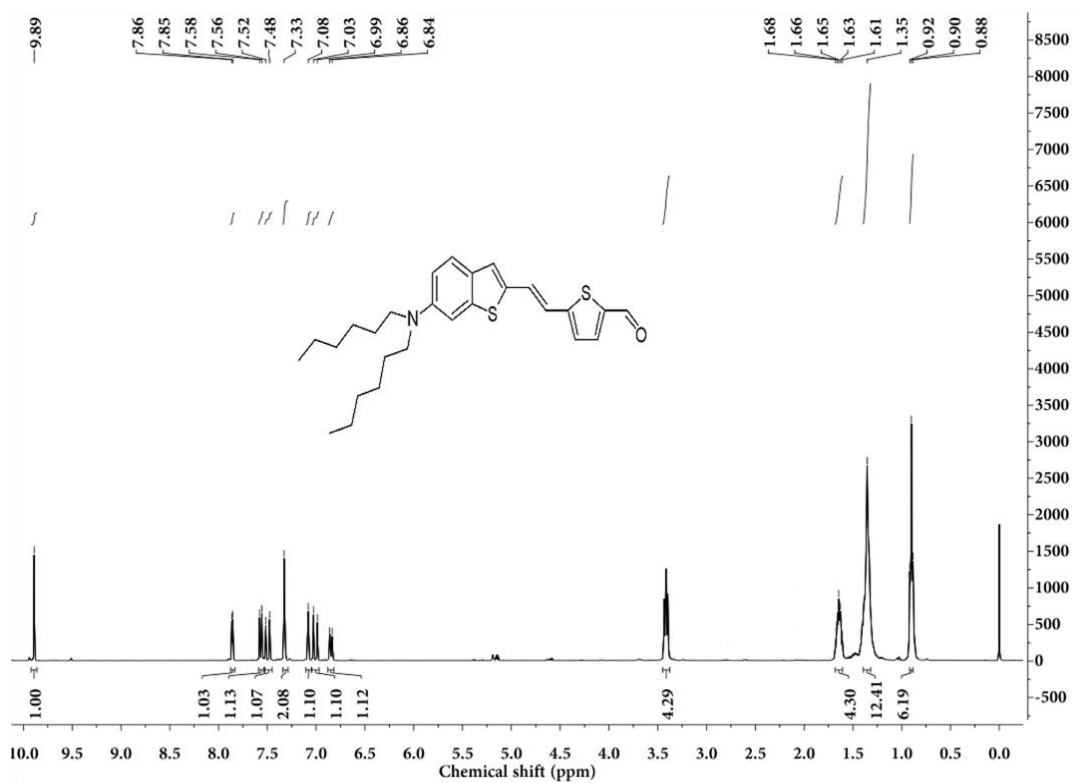

Figure S10.  $^{13}\text{C}$  NMR spectrum of compound 5

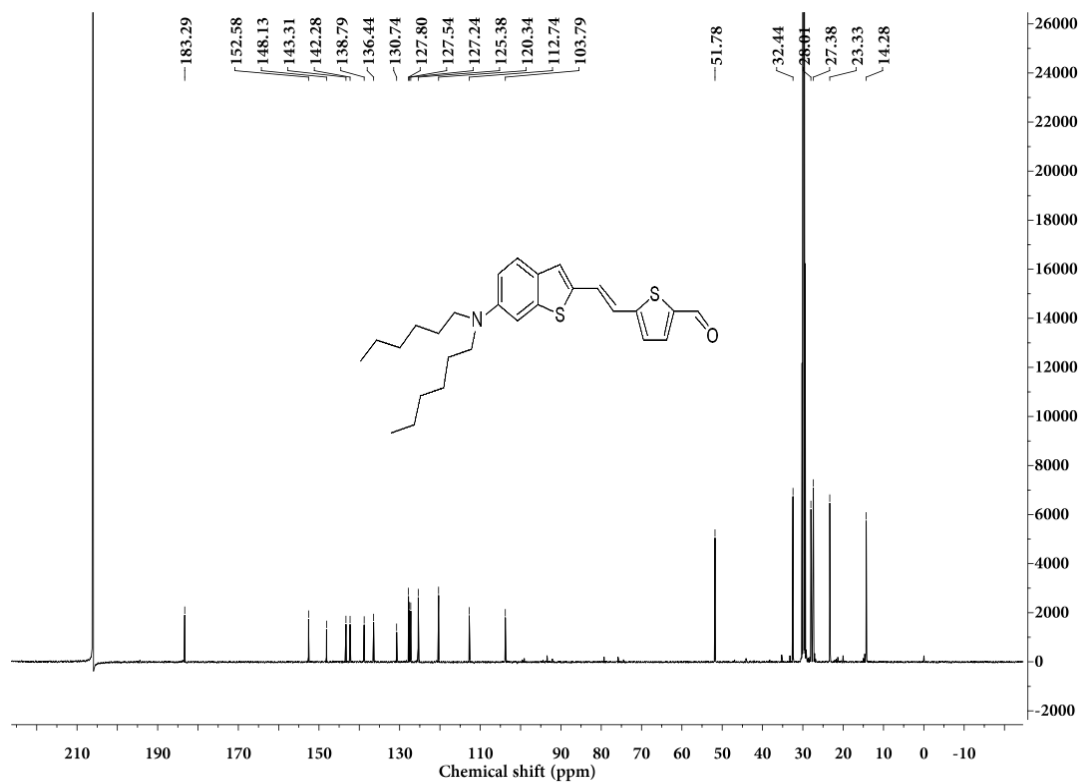

Figure S11.  $^1\text{H}$  NMR spectrum of compound B

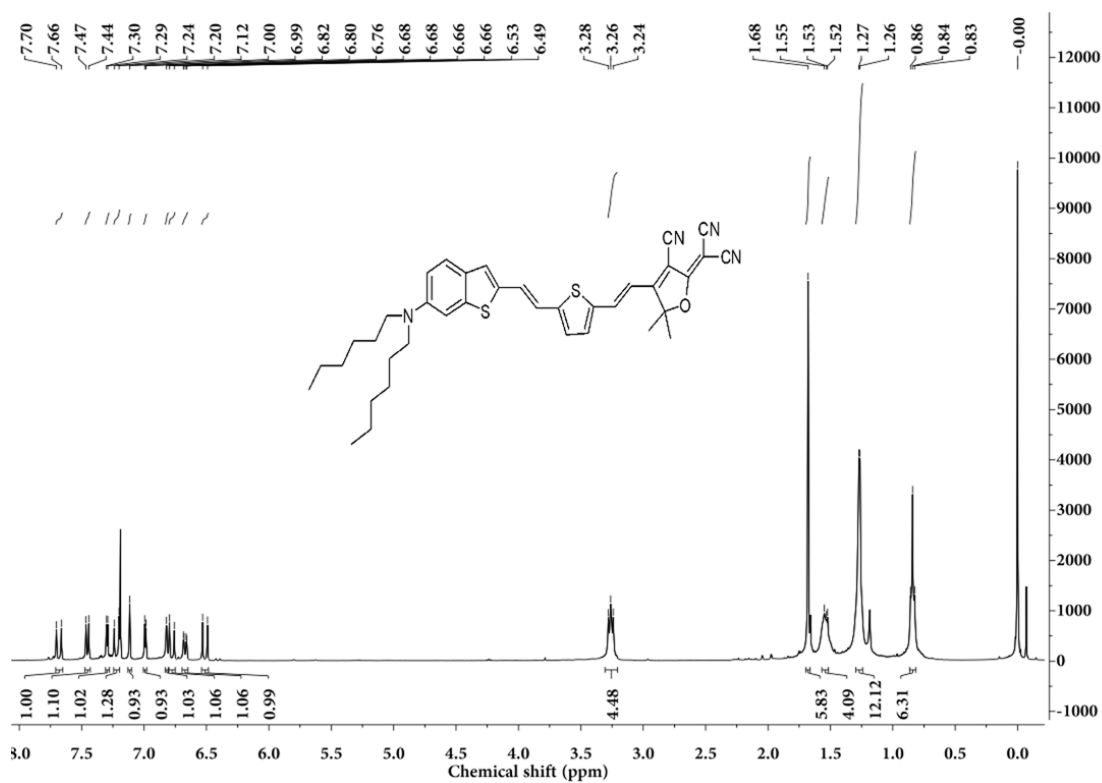

Figure S12.  $^{13}\text{C}$  NMR spectrum of compound B

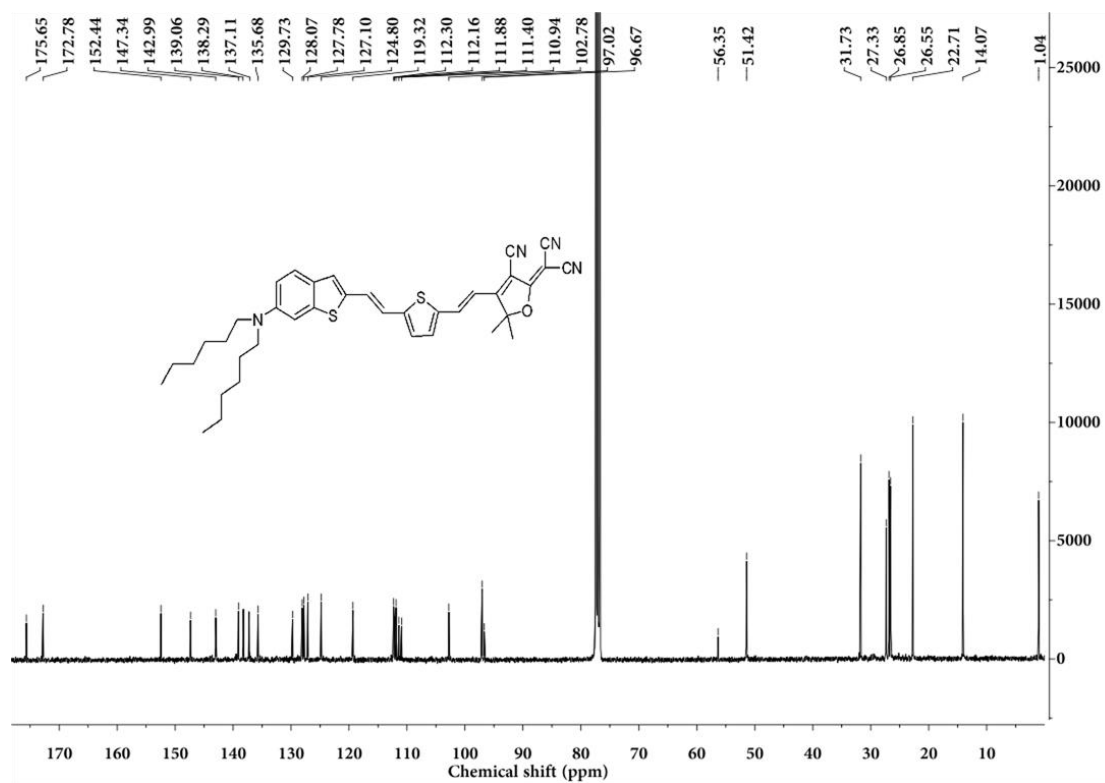

Supplement: c4ra00883a1.pdf [file c4ra00883a1.pdf]
